# Supplementary material for: Superior CoO/SiC nanowire field emitters with substantially increased stable emission sites: ultralow turn-on field, high current density and high stability
Source: Royal Society of Chemistry journal article supplement (doi:10.1039/d2tc04007g), 2023-01-01
Supplement: d2tc04007g1.pdf [file d2tc04007g1.pdf]

## **Electronic Supplementary Information**

### **Superior CoO/SiC Nanowire Field Emitters with Substantially Increased Stable Emission Sites: Ultralow Turn-on field, High Current Density and High Stability**

*Kai Song<sup>1,2,3,4</sup>, Xiaoxiao Li<sup>1,5</sup>, Weijun Li<sup>1</sup>, Lin Wang<sup>1</sup>, Chuangchuang Gong<sup>2,3</sup>, Feng Hu<sup>1</sup>, Fengmei Gao<sup>1</sup>, Fang He<sup>2,3,\*</sup>, and Shanliang Chen<sup>1,\*</sup>*

<sup>1</sup> *Institute of Micro/Nano Materials and Devices, Ningbo University of Technology, Ningbo City, 315211, P.R. China*

<sup>2</sup> *School of Materials Science and Engineering, Tianjin University, Tianjin City, 300350, P.R. China*

<sup>3</sup> *Tianjin Key Laboratory of Composite and Functional Materials, Tianjin University, Tianjin City, 300350, P.R. China*

<sup>4</sup> *Shanxi Key Laboratory of Metal Forming Theory and Technology, Taiyuan University of Science and Technology, Taiyuan 030024, P. R. China*

<sup>5</sup> *School of Physics and Electronic Engineering, Jiangsu Normal University, Xuzhou City, 221116, P. R. China*

#### ***Corresponding Authors:***

Corresponding authors. E-mails: [fanghe@tju.edu.cn](mailto:fanghe@tju.edu.cn) (F. He) and [csl211.kd@163.com](mailto:csl211.kd@163.com) (S. Chen)

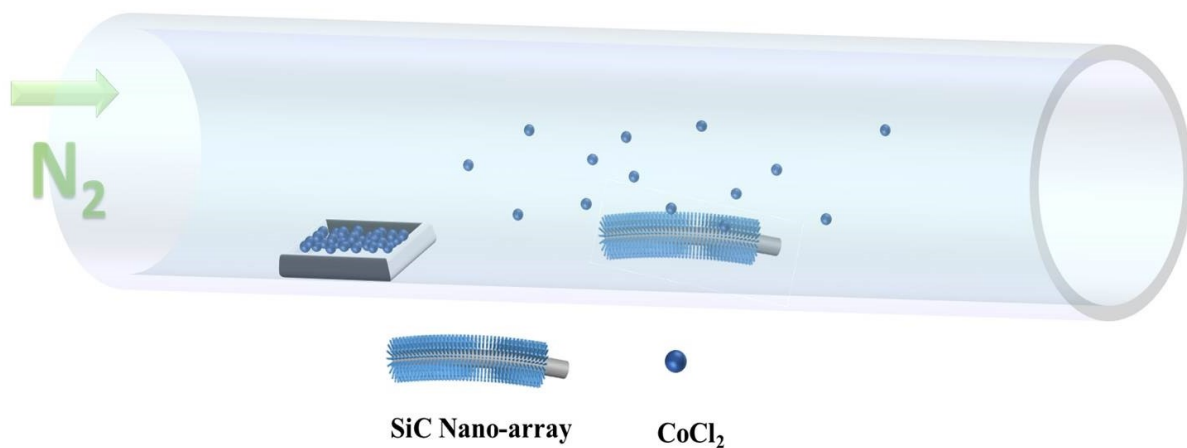

**Fig. S1** Schematic diagram of cation exchange experimental process about the fabrication of CoO/SiC heterojunction nanowires.

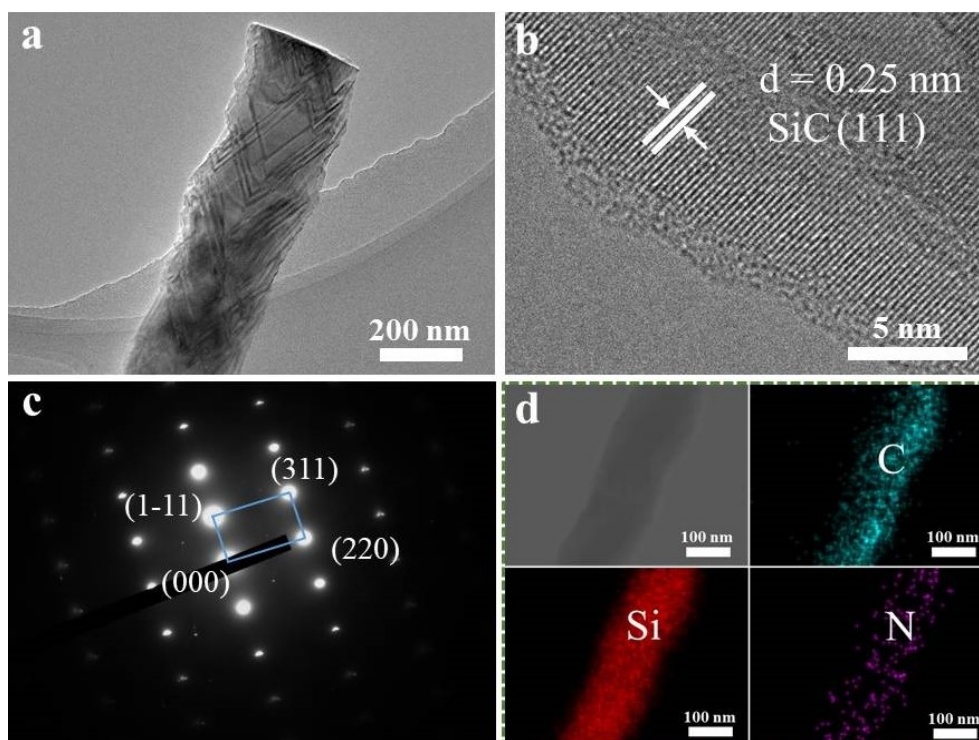

**Fig. S2** The typical TEM images of the bare single SiC nanowire: (a) low-resolution and (b) high-resolution TEM images, (c) selected area electron diffraction patterns (SEAD) and (d) element mappings of bare SiC samples, respectively.

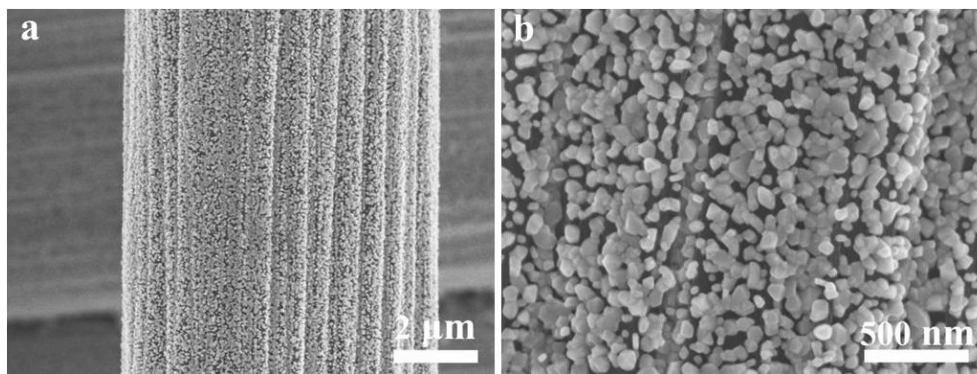

**Fig. S3** The typical SEM images of the fabricated CoO nanoparticles on the carbon fiber substrate at different magnifications. The purpose of preparing pure CoO nanoparticles is to avoid the impact of SiC on the final results during UPS testing.
